# Supplementary material for: A Facile Method for the Fabrication of Silver Nanoparticles Surface Decorated Polyvinyl Alcohol Electrospun Nanofibers and Controllable Antibacterial Activities
Source: PubMed Central journal article supplement (PMC7693976; doi:10.3390/polym12112486), 2020-10-26
Supplement: polymers-12-02486-s001.pdf [file polymers-12-02486-s001.pdf]

Supplementary Material of

**A Facile Method for the Fabrication of Silver Nanoparticles Surface Decorated Polyvinyl Alcohol Electrospun Nanofibers and Controllable Antibacterial Activities**

Yan Yang <sup>1</sup>, Zhijie Zhang <sup>2</sup>, Menghui Wan <sup>1</sup>, Zhihua Wang <sup>3,\*</sup>, Xueyan Zou <sup>1</sup>, Yanbao Zhao <sup>1</sup> and Lei Sun <sup>1,\*</sup>

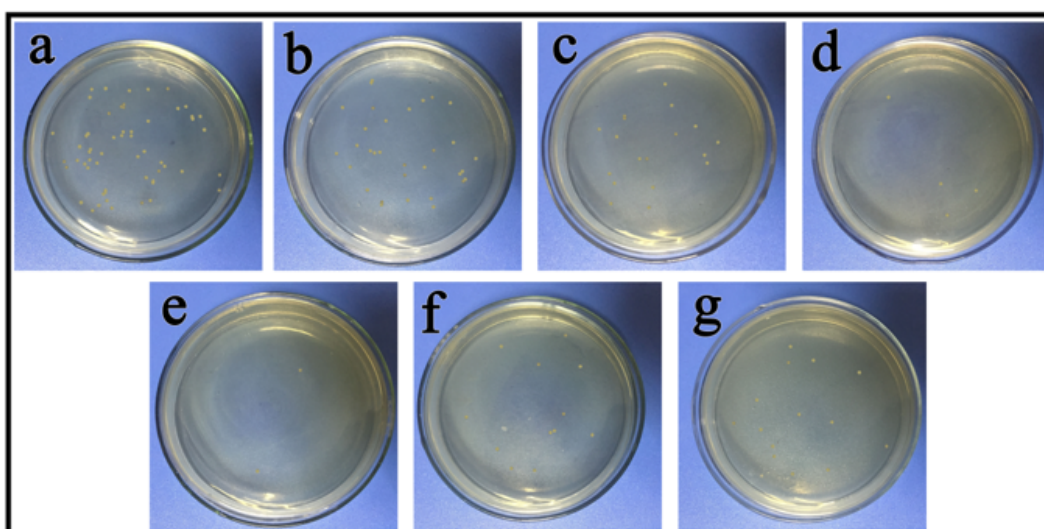

**Figure 1.** Photographs of survival colonies on the agar Petri dish evaluated by the absorption method for Ag/PVA CNFs prepared with different AgNO<sub>3</sub> concentration of (a) neat PVA, (b) 0.016, (c) 0.033, (d) 0.049, (e) 0.066, (f) 0.098, and (g) 0.132 mol/L against *E. coli*.

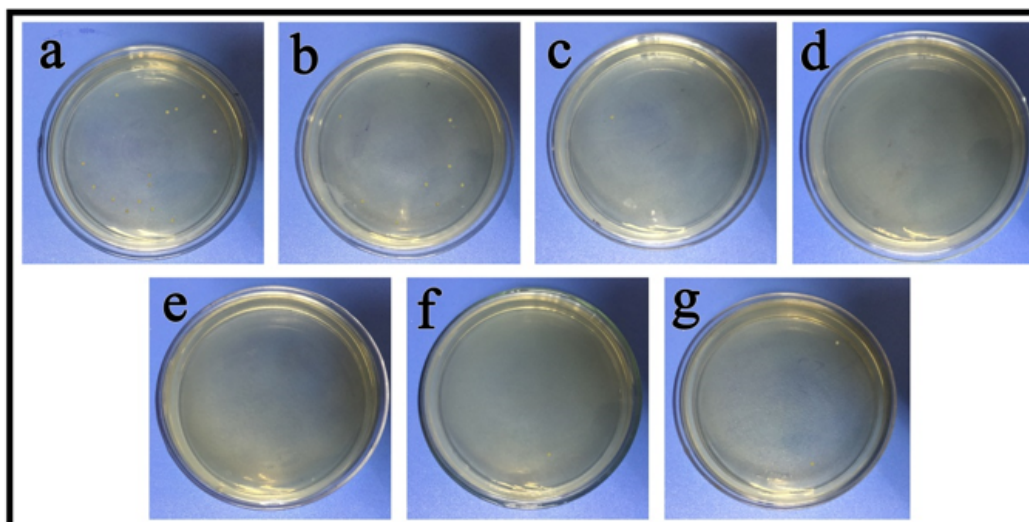

**Figure 2.** Photographs of survival colonies on the agar Petri dish evaluated by the absorption method for Ag/PVA CNFs prepared with different AgNO<sub>3</sub> concentration of (a) neat PVA, (b) 0.016, (c) 0.033, (d) 0.049, (e) 0.066, (f) 0.098, and (g) 0.132 mol/L against *S. aureus*.

**Publisher's Note:** MDPI stays neutral with regard to jurisdictional claims in published maps and institutional affiliations.

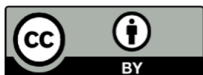

© 2020 by the authors. Submitted for possible open access publication under the terms and conditions of the Creative Commons Attribution (CC BY) license (<http://creativecommons.org/licenses/by/4.0/>).
